# Supplementary material for: Simple and Accurate Exchange Energy for Density Functional Theory
Source: MDPI journal article supplement (doi:10.3390/molecules25153485), 2020-07-31
Supplement: s1 [file s1]

# Supplementary Material

## Simple and accurate exchange energy for density functional theory

Teepanis Chachiyo,<sup>1,2,\*</sup> and Hathaithip Chachiyo<sup>3</sup>

<sup>1</sup> Department of Physics, Faculty of Science, Naresuan University, Phitsanulok 65000 Thailand  
email: teepanisc@nu.ac.th

<sup>2</sup> Thailand Center of Excellence in Physics, Ministry of Higher Education, Science, Research and Innovation, 328 Si Ayutthaya Road, Bangkok 10400, Thailand

<sup>3</sup> Independent Researcher, Phitsanulok 65000, Thailand      email: hathaithip.chachiyo@gmail.com

\* Corresponding author

### Acknowledgements

Support by Thailand Center of Excellence in Physics grant No. ThEP-60-PET-NU9 is gratefully acknowledged.

|                                                                                       | Page |
|---------------------------------------------------------------------------------------|------|
| 1) Proof that $\frac{2K^2[\rho(\vec{R})]^2}{ \vec{\nabla}\rho ^2} = 1$ on average     | S2   |
| 2) Proof that the errors of total energies and bond energies are the same (magnitude) | S3   |
| 3) Calculated Energies                                                                | S5   |
| 4) Errors of the Calculated Energies                                                  | S8   |
| 5) Dipole Moments and Zero Point Energies                                             | S11  |
| 6) Molecular Coordinates                                                              | S12  |
| 7) Basis Set Convergence Test                                                         | S13  |
| 8) References                                                                         | S16  |

**Proof that  $\frac{2K^2[\rho(\vec{K})]^2}{|\vec{\nabla}\rho|^2} = 1$  on average**

Upon perturbation by a periodic external potential  $V_{\text{ext}}(\vec{K})e^{+i\vec{K}\cdot\vec{r}} + V_{\text{ext}}(-\vec{K})e^{-i\vec{K}\cdot\vec{r}}$ , the free-electron gas density becomes

$$\rho = \rho_0 + \rho(\vec{K})e^{+i\vec{K}\cdot\vec{r}} + \rho(-\vec{K})e^{-i\vec{K}\cdot\vec{r}} = \rho_0 + 2\rho(\vec{K})\cos(\vec{K}\cdot\vec{r}), \quad (\text{S1})$$

which leads to the gradient of electron density

$$\vec{\nabla}\rho = -2\rho(\vec{K})\sin(\vec{K}\cdot\vec{r})\vec{K} \quad (\text{S2})$$

and

$$|\vec{\nabla}\rho|^2 = 4K^2[\rho(\vec{K})]^2\sin^2(\vec{K}\cdot\vec{r}). \quad (\text{S3})$$

Therefore, the average of  $|\vec{\nabla}\rho|^2$  over the normalization volume  $\Omega$  is

$$\frac{1}{\Omega} \int |\vec{\nabla}\rho|^2 d^3r = \frac{1}{\Omega} 4[\rho(\vec{K})]^2 K^2 \int \sin^2(\vec{K}\cdot\vec{r}) d^3r. \quad (\text{S4})$$

Since the volume is periodic, replacing the integrand with  $\cos^2(\vec{K}\cdot\vec{r})$  would only shift the phase, but the integrated value would not change. In other words,

$$\int \sin^2(\vec{K}\cdot\vec{r}) d^3r = \int \cos^2(\vec{K}\cdot\vec{r}) d^3r = \frac{1}{2} \int [\cos^2(\vec{K}\cdot\vec{r}) + \sin^2(\vec{K}\cdot\vec{r})] d^3r = \frac{\Omega}{2}. \quad (\text{S5})$$

Hence,

$$\frac{1}{\Omega} \int |\vec{\nabla} \rho|^2 d^3r = 2K^2 [\rho(\vec{K})]^2. \quad (\text{S6})$$

Consider  $\frac{2K^2 [\rho(\vec{K})]^2}{|\vec{\nabla} \rho|^2}$ . If we replace the term  $|\vec{\nabla} \rho|^2$  by its average value as shown in the above expression, we have

$$\frac{2K^2 [\rho(\vec{K})]^2}{|\vec{\nabla} \rho|^2} = 1 \text{ on average.} \quad (\text{S7})$$

### **Proof that the errors of total energies and bond energies are the same (magnitude)**

Let  $E_{\text{exact}}^{(\text{M})}$  and  $E_{\text{exact}}^{(\text{A})}$  be the exact total energies of molecules and of atoms, respectively. If a theory predicts the total energy of a molecule to be  $E_{\text{theory}}^{(\text{M})}$ , then the error is equal to

$$\Delta E^{(\text{M})} = E_{\text{theory}}^{(\text{M})} - E_{\text{exact}}^{(\text{M})}. \quad (\text{S8})$$

A (positive value) bond energy is computed by subtracting the molecular total energy from the sum of atomic energies.

$$E_{\text{exact}}^{(\text{Bond})} = \sum_{\text{A} \in \text{atoms}} E_{\text{exact}}^{(\text{A})} - E_{\text{exact}}^{(\text{M})}. \quad (\text{S9})$$

For a theoretical prediction of bond energy, both the molecular energy and the atomic energies are from the same theory, relying on a certain degree of error cancellation, even though the  $E_{\text{theory}}^{(\text{M})}$  and  $E_{\text{theory}}^{(\text{A})}$  are both off by huge amount, the difference is still quite accurate.

However, let us evaluate the bond energy using

$$E_{\text{theory}}^{(\text{Bond})} = \sum_{A \in \text{atoms}} E_{\text{exact}}^{(A)} - E_{\text{theory}}^{(M)}. \quad (\text{S10})$$

Notice how we are using the exact atomic energies instead of the theoretical ones. The error of the bond energy in Eq. (S10) is

$$\begin{aligned} \Delta E^{(\text{Bond})} &= E_{\text{theory}}^{(\text{Bond})} - E_{\text{exact}}^{(\text{Bond})} \\ &= \left( \sum_{A \in \text{atoms}} E_{\text{exact}}^{(A)} - E_{\text{theory}}^{(M)} \right) - E_{\text{exact}}^{(\text{Bond})}. \end{aligned} \quad (\text{S11})$$

Substituting  $E_{\text{exact}}^{(\text{Bond})} = \sum_{A \in \text{atoms}} E_{\text{exact}}^{(A)} - E_{\text{exact}}^{(M)}$  from Eq. (S9) into the above expression yields,

$$\Delta E^{(\text{Bond})} = \left( \sum_{A \in \text{atoms}} E_{\text{exact}}^{(A)} - E_{\text{theory}}^{(M)} \right) - \left( \sum_{A \in \text{atoms}} E_{\text{exact}}^{(A)} - E_{\text{exact}}^{(M)} \right) \quad (\text{S12})$$

The atomic energies cancel and we are left with

$$\Delta E^{(\text{Bond})} = -E_{\text{theory}}^{(M)} + E_{\text{exact}}^{(M)}, \quad (\text{S13})$$

which is precisely the negative of Eq. (S8). Therefore,

$$\Delta E^{(M)} = -\Delta E^{(\text{Bond})} \quad (\text{S14})$$

In other words, the error of predicted the molecular total energies is of the same magnitude as that of the bond energies prediction, provided that we use the exact atomic energies as in Eq. (S10).

## Calculated Energies

Reference total energies used to compute the errors are from Ref. [1].

**Table S1.** Atomic total energies

| <div> <b>Color Code</b><br/> <b>Calculated Values</b> &lt;&lt; Copied by values from Siam Quantum<br/> <b>Analysis</b> &lt;&lt; Worksheet formula         </div>                                                                                                                                                                                                                                    |             |               |          |          |         |             |                            |
|-----------------------------------------------------------------------------------------------------------------------------------------------------------------------------------------------------------------------------------------------------------------------------------------------------------------------------------------------------------------------------------------------------|-------------|---------------|----------|----------|---------|-------------|----------------------------|
| <div> <div> <div>(This Work)</div> <div>Ettotal</div> <div>QZP-gh</div> <div>[Ha]</div> </div> <div> <div>---- Core Exchange Correction Scheme for Ne and 2nd-row atoms ----</div> <div> <div>Exchange Energy @HF Density</div> <div>Core Config.   DFT ex.   HF ex.</div> </div> <div> <div>(This Work)</div> <div>Correction Corrected Energies</div> <div>[Ha]   [Ha]</div> </div> </div> </div> |             |               |          |          |         |             |                            |
| name                                                                                                                                                                                                                                                                                                                                                                                                |             |               |          |          |         |             |                            |
| H                                                                                                                                                                                                                                                                                                                                                                                                   | -0.502981   |               |          |          |         | 0           | -0.502981 (No Correction)  |
| He                                                                                                                                                                                                                                                                                                                                                                                                  | -2.908144   |               |          |          |         | 0           | -2.908144 (No Correction)  |
| Li                                                                                                                                                                                                                                                                                                                                                                                                  | -7.486352   |               |          |          |         | 0           | -7.486352 (No Correction)  |
| Be                                                                                                                                                                                                                                                                                                                                                                                                  | -14.659224  |               |          |          |         | 0           | -14.659224 (No Correction) |
| B                                                                                                                                                                                                                                                                                                                                                                                                   | -24.647743  |               |          |          |         | 0           | -24.647743 (No Correction) |
| C                                                                                                                                                                                                                                                                                                                                                                                                   | -37.839799  |               |          |          |         | 0           | -37.839799 (No Correction) |
| N                                                                                                                                                                                                                                                                                                                                                                                                   | -54.582274  |               |          |          |         | 0           | -54.582274 (No Correction) |
| O                                                                                                                                                                                                                                                                                                                                                                                                   | -75.066050  |               |          |          |         | 0           | -75.066050 (No Correction) |
| F                                                                                                                                                                                                                                                                                                                                                                                                   | -99.731913  |               |          |          |         | 0           | -99.731913 (No Correction) |
| Ne                                                                                                                                                                                                                                                                                                                                                                                                  | -128.928050 | Ne8+ [1s]     | -6.0070  | -6.0277  | -0.0207 | -128.948712 |                            |
| Na                                                                                                                                                                                                                                                                                                                                                                                                  | -162.240410 | Na9+ [1s]     | -6.6291  | -6.6526  | -0.0235 | -162.263942 |                            |
| Mg                                                                                                                                                                                                                                                                                                                                                                                                  | -200.026734 | Mg10+ [1s]    | -7.2511  | -7.2776  | -0.0265 | -200.053214 |                            |
| Al                                                                                                                                                                                                                                                                                                                                                                                                  | -242.317156 | Al11+ [1s]    | -7.8733  | -7.9027  | -0.0294 | -242.346556 |                            |
| Si                                                                                                                                                                                                                                                                                                                                                                                                  | -289.322973 | Si4+ [1s2s2p] | -19.1780 | -19.2117 | -0.0337 | -289.356653 |                            |
| P                                                                                                                                                                                                                                                                                                                                                                                                   | -341.212425 | P5+ [1s2s2p]  | -20.9280 | -20.9719 | -0.0439 | -341.256335 |                            |
| S                                                                                                                                                                                                                                                                                                                                                                                                   | -398.057341 | S6+ [1s2s2p]  | -22.6763 | -22.7297 | -0.0535 | -398.110801 |                            |
| Cl                                                                                                                                                                                                                                                                                                                                                                                                  | -460.087376 | Cl7+ [1s2s2p] | -24.4236 | -24.4858 | -0.0621 | -460.149526 |                            |
| Ar                                                                                                                                                                                                                                                                                                                                                                                                  | -527.466732 | Ar8+ [1s2s2p] | -26.1695 | -26.2403 | -0.0709 | -527.537593 |                            |

Table S2. 56 molecular total energies

|            | (This Work)<br>Etotal<br>QZP-gh<br>[Ha] | (This Work)<br>Corrected Etotal<br>QZP-gh<br>[Ha] | (This Work)<br>Ebond<br>QZP-gh<br>[kcal/mol] | (This Work)<br>Corrected Ebond<br>QZP-gh<br>[kcal/mol] |
|------------|-----------------------------------------|---------------------------------------------------|----------------------------------------------|--------------------------------------------------------|
| name       |                                         |                                                   |                                              |                                                        |
| H2         | -1.178148                               | -1.178148                                         | 108.04833                                    | 111.789543                                             |
| LiH        | -8.074777                               | -8.074777                                         | 53.616912                                    | 60.66572539                                            |
| BeH        | -15.252419                              | -15.252419                                        | 56.610132                                    | 53.35022091                                            |
| Li2        | -14.998953                              | -14.998953                                        | 16.471494                                    | 26.82790899                                            |
| CH         | -38.475660                              | -38.475660                                        | 83.383448                                    | 81.99037703                                            |
| CH2 (1A1)  | -39.126332                              | -39.126332                                        | 176.06094                                    | 176.538472                                             |
| CH2 (3B1)  | -39.152413                              | -39.152413                                        | 192.42701                                    | 192.9045444                                            |
| NH         | -55.223226                              | -55.223226                                        | 86.578098                                    | 84.10257364                                            |
| CH3        | -39.836455                              | -39.836455                                        | 306.04449                                    | 308.3926278                                            |
| NH2        | -55.882231                              | -55.882231                                        | 184.48462                                    | 183.8797044                                            |
| OH         | -75.739939                              | -75.739939                                        | 107.24637                                    | 108.3325938                                            |
| CH4        | -40.512545                              | -40.512545                                        | 414.67201                                    | 418.8907564                                            |
| H2O        | -76.437104                              | -76.437104                                        | 229.09866                                    | 232.0554828                                            |
| HF         | -100.456684                             | -100.456684                                       | 139.17531                                    | 139.7990522                                            |
| NH3        | -56.562424                              | -56.562424                                        | 295.68682                                    | 296.952504                                             |
| LiF        | -107.430160                             | -107.430160                                       | 132.9661                                     | 136.8974487                                            |
| CN         | -92.720175                              | -92.720175                                        | 187.0618                                     | 179.4519981                                            |
| C2H2       | -77.326369                              | -77.326369                                        | 402.11367                                    | 399.3275236                                            |
| CO         | -113.318379                             | -113.318379                                       | 258.86645                                    | 254.818386                                             |
| HCN        | -93.426175                              | -93.426175                                        | 314.45813                                    | 308.7189326                                            |
| N2         | -109.534502                             | -109.534502                                       | 232.14961                                    | 223.4573492                                            |
| HCO        | -113.861188                             | -113.861188                                       | 283.85889                                    | 281.6814355                                            |
| NO         | -129.905881                             | -129.905881                                       | 161.61944                                    | 156.4889194                                            |
| C2H4       | -78.579291                              | -78.579291                                        | 557.08338                                    | 558.0384538                                            |
| H2CO       | -114.507057                             | -114.507057                                       | 373.52245                                    | 373.2156029                                            |
| O2         | -150.345597                             | -150.345597                                       | 133.97137                                    | 132.402599                                             |
| C2H6       | -79.816232                              | -79.816232                                        | 702.02488                                    | 706.7211564                                            |
| F2         | -199.537481                             | -199.537481                                       | 46.219204                                    | 43.72548187                                            |
| H2O2       | -151.568159                             | -151.568159                                       | 269.88991                                    | 272.0623441                                            |
| H3COH      | -115.724642                             | -115.724642                                       | 506.31787                                    | 509.7522337                                            |
| N2H4       | -111.873459                             | -111.873459                                       | 437.36589                                    | 436.1560498                                            |
| CO2        | -188.605665                             | -188.605665                                       | 397.69412                                    | 392.8616669                                            |
| SiH2 (1A1) | -290.562529                             | -290.596209                                       | 146.58243                                    | 148.8508751                                            |
| SiH2 (3B1) | -290.538366                             | -290.572046                                       | 131.41992                                    | 133.6883657                                            |
| PH2        | -342.461371                             | -342.505281                                       | 152.47474                                    | 154.5436403                                            |
| SiH3       | -291.184418                             | -291.218098                                       | 221.19832                                    | 225.3373673                                            |
| H2S        | -399.348422                             | -399.401882                                       | 178.91485                                    | 183.1586961                                            |
| HCl        | -460.756891                             | -460.819041                                       | 104.50165                                    | 107.3298337                                            |
| PH3        | -343.097163                             | -343.141073                                       | 235.81489                                    | 239.7543955                                            |
| SiH4       | -291.831002                             | -291.864682                                       | 311.31055                                    | 317.3202039                                            |
| CS         | -436.168105                             | -436.221565                                       | 170.03308                                    | 167.2720408                                            |
| SiO        | -364.685259                             | -364.718939                                       | 185.89087                                    | 183.6337207                                            |
| SO         | -473.330888                             | -473.384348                                       | 130.20632                                    | 129.9245644                                            |
| ClO        | -535.267984                             | -535.330134                                       | 71.886221                                    | 72.05941341                                            |
| CH3Cl      | -500.056311                             | -500.118461                                       | 389.17693                                    | 392.4826512                                            |
| ClF        | -559.921683                             | -559.983833                                       | 64.253197                                    | 63.96391475                                            |
| H3CSH      | -438.651663                             | -438.705123                                       | 465.98785                                    | 470.7092269                                            |
| HOCl       | -535.919752                             | -535.981902                                       | 165.25146                                    | 167.2952587                                            |
| SO2        | -548.595256                             | -548.648716                                       | 254.65272                                    | 253.5865851                                            |
| Na2        | -324.499718                             | -324.546782                                       | 11.858672                                    | 23.58305793                                            |
| NaCl       | -622.471571                             | -622.557253                                       | 90.226438                                    | 97.04620985                                            |
| Si2        | -578.766347                             | -578.833707                                       | 75.552758                                    | 72.6072291                                             |
| P2         | -682.606650                             | -682.694470                                       | 114.08121                                    | 110.7365822                                            |
| S2         | -796.284027                             | -796.390947                                       | 106.26558                                    | 107.2708479                                            |
| Cl2        | -920.267031                             | -920.391331                                       | 57.905939                                    | 59.82109775                                            |
| Si2H6      | -582.479772                             | -582.547132                                       | 512.01001                                    | 520.2881164                                            |

**Table S3.** DFT total energies of the first-row molecules.

| <b>Name</b> | <b>Siam Quantum<br/>B3LYP/QZP-g<br/>[Hartrees]</b> | <b>Siam Quantum<br/>BLYP/QZP-g<br/>[Hartrees]</b> | <b>Siam Quantum<br/>OLYP/QZP-g<br/>[Hartrees]</b> | <b>Siam Quantum<br/>PBE/QZP-g<br/>[Hartrees]</b> |
|-------------|----------------------------------------------------|---------------------------------------------------|---------------------------------------------------|--------------------------------------------------|
| H2          | -1.18056                                           | -1.17014                                          | -1.17496                                          | -1.16654                                         |
| LiH         | -8.08863                                           | -8.07295                                          | -8.07506                                          | -8.04712                                         |
| BeH         | -15.26792                                          | -15.24996                                         | -15.25369                                         | -15.21809                                        |
| Li2         | -15.01879                                          | -14.99773                                         | -15.00665                                         | -14.95573                                        |
| CH          | -38.49950                                          | -38.48258                                         | -38.48077                                         | -38.43237                                        |
| CH2 (1A1)   | -39.15382                                          | -39.13167                                         | -39.13090                                         | -39.08233                                        |
| CH2 (3B1)   | -39.17228                                          | -39.14730                                         | -39.15291                                         | -39.10773                                        |
| NH          | -55.24805                                          | -55.23170                                         | -55.23017                                         | -55.17488                                        |
| CH3         | -39.86269                                          | -39.83175                                         | -39.83695                                         | -39.79174                                        |
| NH2         | -55.90976                                          | -55.88897                                         | -55.88703                                         | -55.83415                                        |
| OH          | -75.77387                                          | -75.76029                                         | -75.74915                                         | -75.68823                                        |
| CH4         | -40.54208                                          | -40.50500                                         | -40.51359                                         | -40.46725                                        |
| H2O         | -76.47128                                          | -76.45418                                         | -76.44742                                         | -76.38508                                        |
| HF          | -100.49716                                         | -100.48725                                        | -100.47177                                        | -100.39879                                       |
| NH3         | -56.59238                                          | -56.56566                                         | -56.56763                                         | -56.51471                                        |
| LiF         | -107.48529                                         | -107.47279                                        | -107.44945                                        | -107.35712                                       |
| CN          | -92.75304                                          | -92.74576                                         | -92.73699                                         | -92.64741                                        |
| C2H2        | -77.36979                                          | -77.33936                                         | -77.33786                                         | -77.25720                                        |
| CO          | -113.36633                                         | -113.35492                                        | -113.33719                                        | -113.23967                                       |
| HCN         | -93.46932                                          | -93.44985                                         | -93.44160                                         | -93.35214                                        |
| N2          | -109.57759                                         | -109.56654                                        | -109.55413                                        | -109.45692                                       |
| HCO         | -113.90849                                         | -113.89237                                        | -113.87850                                        | -113.78081                                       |
| NO          | -129.95206                                         | -129.94560                                        | -129.92820                                        | -129.82142                                       |
| C2H4        | -78.62906                                          | -78.58318                                         | -78.58777                                         | -78.50575                                        |
| H2CO        | -114.56070                                         | -114.53550                                        | -114.52547                                        | -114.42588                                       |
| O2          | -150.39529                                         | -150.39304                                        | -150.37298                                        | -150.25452                                       |
| C2H6        | -79.87133                                          | -79.80794                                         | -79.82133                                         | -79.73820                                        |
| F2          | -199.60687                                         | -199.60916                                        | -199.56833                                        | -199.43100                                       |
| H2O2        | -151.62851                                         | -151.61218                                        | -151.58899                                        | -151.47478                                       |
| H3COH       | -115.78533                                         | -115.74284                                        | -115.73822                                        | -115.63915                                       |
| N2H4        | -111.92927                                         | -111.88770                                        | -111.88641                                        | -111.79023                                       |
| CO2         | -188.67806                                         | -188.68408                                        | -188.64015                                        | -188.48690                                       |

## Errors of the Calculated Energies

Refer to the supplemental material of Ref. [2] for the reported QMC total energies and bond energies. We calculated the errors as compared to the experimentally derived energies from Ref. [1].

**Table S4.** Errors of the predicted atomic total energies.

| name          | Error of Etot        |                      |                         |
|---------------|----------------------|----------------------|-------------------------|
|               | As IS                | Corrected            | DMC                     |
|               | QZP-gh<br>[kcal/mol] | QZP-gh<br>[kcal/mol] | Nemec2010<br>[kcal/mol] |
| H             | -1.9                 | -1.9                 | 0.0                     |
| He            | -2.8                 | -2.8                 | 0.0                     |
| Li            | -5.2                 | -5.2                 | 0.1                     |
| Be            | 5.1                  | 5.1                  | 6.3                     |
| B             | 3.9                  | 3.9                  | 8.6                     |
| C             | 3.3                  | 3.3                  | 9.3                     |
| N             | 4.3                  | 4.3                  | 7.9                     |
| O             | 0.8                  | 0.8                  | 9.3                     |
| F             | 1.2                  | 1.2                  | 9.9                     |
| Ne            | 6.0                  | -7.0                 | 8.9                     |
| Na            | 8.9                  | -5.9                 | 9.4                     |
| Mg            | 16.5                 | -0.1                 | 13.1                    |
| Al            | 18.1                 | -0.3                 | 15.8                    |
| Si            | 22.6                 | 1.5                  | 19.7                    |
| P             | 29.2                 | 1.7                  | 22.9                    |
| S             | 33.0                 | -0.5                 | 27.7                    |
| Cl            | 38.0                 | -1.0                 | 33.3                    |
| Ar            | 46.0                 | 1.5                  | 36.8                    |
| Average       | 12.6                 | -0.1                 | 13.3                    |
| MAE           | 13.7                 | 2.7                  | 13.3                    |
| First row MAE | 3.4                  | 3.5                  | 6.0                     |
| First row Avg | 1.5                  | 0.2                  | 6.0                     |



Table S5. Errors of the predicted molecular total energies.

| name           | Error of Etot        |                      |                         |  | Error of E <sub>bond</sub> |                      |                         |
|----------------|----------------------|----------------------|-------------------------|--|----------------------------|----------------------|-------------------------|
|                | As IS                | Corrected            | DMC                     |  | As IS                      | Corrected            | DMC                     |
|                | QZP-gh<br>[kcal/mol] | QZP-gh<br>[kcal/mol] | Nemec2010<br>[kcal/mol] |  | QZP-gh<br>[kcal/mol]       | QZP-gh<br>[kcal/mol] | Nemec2010<br>[kcal/mol] |
| H2             | -2.3                 | -2.3                 |                         |  | -1.5                       | 2.3                  |                         |
| LiH            | -2.7                 | -2.7                 | 0.0                     |  | -4.3                       | 2.7                  | 0.0                     |
| BeH            | -3.5                 | -3.5                 | 0.5                     |  | 6.8                        | 3.5                  | 5.8                     |
| Li2            | -2.4                 | -2.4                 | 2.1                     |  | -7.9                       | 2.4                  | -2.0                    |
| CH             | 2.0                  | 2.0                  | 9.4                     |  | -0.6                       | -2.0                 | -0.1                    |
| CH2 (1A1)      | 5.2                  | 5.2                  | 9.8                     |  | -5.7                       | -5.2                 | -0.5                    |
| CH2 (3B1)      | -2.5                 | -2.5                 | 4.5                     |  | 2.0                        | 2.5                  | 4.8                     |
| NH             | -0.3                 | -0.3                 | 8.9                     |  | 2.8                        | 0.3                  | -1.0                    |
| CH3            | -0.6                 | -0.6                 | 4.9                     |  | -1.7                       | 0.6                  | 4.4                     |
| NH2            | -1.8                 | -1.8                 | 7.7                     |  | 2.4                        | 1.8                  | 0.2                     |
| OH             | -1.8                 | -1.8                 | 9.3                     |  | 0.7                        | 1.8                  | 0.0                     |
| CH4            | 2.0                  | 2.0                  | 5.2                     |  | -6.3                       | -2.0                 | 4.1                     |
| H2O            | 0.8                  | 0.8                  | 9.0                     |  | -3.7                       | -0.8                 | 0.3                     |
| HF             | 1.6                  | 1.6                  | 9.6                     |  | -2.2                       | -1.6                 | 0.3                     |
| NH3            | 1.4                  | 1.4                  | 7.6                     |  | -2.7                       | -1.4                 | 0.3                     |
| LiF            | 2.7                  | 2.7                  | 9.8                     |  | -6.6                       | -2.7                 | 0.1                     |
| CN             | 3.0                  | 3.0                  | 22.5                    |  | 4.6                        | -3.0                 | -5.3                    |
| C2H2           | 5.7                  | 5.7                  | 13.7                    |  | -2.9                       | -5.7                 | 4.9                     |
| CO             | 4.8                  | 4.8                  | 20.8                    |  | -0.8                       | -4.8                 | -2.2                    |
| HCN            | 3.1                  | 3.1                  | 16.5                    |  | 2.6                        | -3.1                 | 0.7                     |
| N2             | 4.8                  | 4.8                  | 22.4                    |  | 3.9                        | -4.8                 | -6.5                    |
| HCO            | -2.6                 | -2.6                 | 18.3                    |  | 4.8                        | 2.6                  | 0.3                     |
| NO             | -0.7                 | -0.7                 | 27.3                    |  | 5.9                        | 0.7                  | -10.1                   |
| C2H4           | 6.0                  | 6.0                  | 13.5                    |  | -6.9                       | -6.0                 | 5.0                     |
| H2CO           | 1.2                  | 1.2                  | 18.0                    |  | -0.9                       | -1.2                 | 0.6                     |
| O2             | -11.9                | -11.9                | 23.1                    |  | 13.4                       | 11.9                 | -4.5                    |
| C2H6           | 7.0                  | 7.0                  | 11.1                    |  | -11.7                      | -7.0                 | 7.5                     |
| F2             | -4.5                 | -4.5                 | 27.3                    |  | 7.0                        | 4.5                  | -7.5                    |
| H2O2           | -2.9                 | -2.9                 | 22.6                    |  | 0.8                        | 2.9                  | -4.0                    |
| H3COH          | 3.7                  | 3.7                  | 15.0                    |  | -7.2                       | -3.7                 | 3.6                     |
| N2H4           | 2.6                  | 2.6                  | 17.2                    |  | -1.4                       | -2.6                 | -1.3                    |
| CO2            | -2.9                 | -2.9                 | 29.7                    |  | 7.7                        | 2.9                  | -1.9                    |
| SiH2 (1A1)     | 24.7                 | 3.6                  | 18.4                    |  | -5.8                       | -3.6                 | 1.4                     |
| SiH2 (3B1)     | 19.3                 | -1.8                 | 16.3                    |  | -0.5                       | 1.8                  | 3.4                     |
| PH2            | 26.4                 | -1.1                 | 22.5                    |  | -1.0                       | 1.1                  | 0.4                     |
| SiH3           | 23.4                 | 2.3                  | 17.0                    |  | -6.4                       | -2.3                 | 2.7                     |
| H2S            | 34.0                 | 0.5                  | 28.3                    |  | -4.7                       | -0.5                 | -0.6                    |
| HCl            | 39.1                 | 0.1                  | 34.7                    |  | -2.9                       | -0.1                 | -1.4                    |
| PH3            | 30.8                 | 3.2                  | 24.7                    |  | -7.2                       | -3.2                 | -1.8                    |
| SiH4           | 27.2                 | 6.1                  | 14.9                    |  | -12.1                      | -6.1                 | 4.8                     |
| CS             | 38.3                 | 4.7                  | 42.1                    |  | -2.0                       | -4.7                 | -5.1                    |
| SiO            | 30.4                 | 9.3                  | 32.3                    |  | -7.0                       | -9.3                 | -3.3                    |
| SO             | 29.8                 | -3.8                 | 41.2                    |  | 4.1                        | 3.8                  | -4.2                    |
| ClO            | 32.7                 | -6.3                 | 48.9                    |  | 6.1                        | 6.3                  | -6.3                    |
| CH3Cl          | 42.7                 | 3.7                  | 39.2                    |  | -7.0                       | -3.7                 | 3.4                     |
| ClF            | 37.8                 | -1.2                 | 47.9                    |  | 1.4                        | 1.2                  | -4.6                    |
| H3CSH          | 38.1                 | 4.6                  | 35.7                    |  | -9.3                       | -4.6                 | 1.3                     |
| HOCl           | 37.5                 | -1.5                 | 45.5                    |  | -0.5                       | 1.5                  | -2.9                    |
| SO2            | 39.9                 | 6.3                  | 55.5                    |  | -5.3                       | -6.3                 | -9.1                    |
| Na2            | 22.8                 | -6.8                 | 20.6                    |  | -5.0                       | 6.8                  | -1.8                    |
| NaCl           | 55.8                 | 2.0                  | 43.4                    |  | -8.9                       | -2.0                 | -0.7                    |
| Si2            | 45.3                 | 3.1                  | 40.8                    |  | -0.1                       | -3.1                 | -1.4                    |
| P2             | 61.3                 | 6.2                  | 53.5                    |  | -2.8                       | -6.2                 | -7.7                    |
| S2             | 62.9                 | -4.2                 | 61.1                    |  | 3.2                        | 4.2                  | -5.7                    |
| Cl2            | 77.1                 | -0.9                 | 68.8                    |  | -1.0                       | 0.9                  | -2.2                    |
| Si2H6          | 54.9                 | 12.6                 | 33.7                    |  | -20.9                      | -12.6                | 5.7                     |
| Average        | 16.9                 | 1.0                  | 23.7                    |  | -1.9                       | -1.0                 | -0.7                    |
|                | MAE                  | 18.5                 | 23.7                    |  | 4.7                        | 3.5                  | 3.1                     |
| first-row AVG  | 0.4                  | 0.4                  | 13.5                    |  | -0.3                       | -0.4                 | -0.1                    |
|                | first-row MAE        | 3.2                  | 13.5                    |  | 4.4                        | 3.2                  | 2.9                     |
| second-row AVG | 38.8                 | 1.7                  | 37.0                    |  | -4.0                       | -1.7                 | -1.5                    |
|                | second-row MAE       | 38.8                 | 37.0                    |  | 5.2                        | 4.0                  | 3.4                     |

3) Other QMC results. Refer to Ref. [3] for the reported QMC total energies. Here we computed the errors in kcal/mol as compared to the exact energies (quoted in the references).

|          |           | [Brown2007]<br>QMC - exact<br>[kcal/mol] |
|----------|-----------|------------------------------------------|
| QMC Type |           |                                          |
| Li       | DMC2-MDBF | 0.00                                     |
| Be       | DMC2-MDBF | 0.03                                     |
| B        | DMC2-MDBF | 0.21                                     |
| C        | DMC2-MDBF | 0.72                                     |
| N        | DMC2-MDBF | 1.19                                     |
| O        | DMC2-MDBF | 3.51                                     |
| F        | DMC2-MDBF | 4.08                                     |
| Ne       | DMC2-MDBF | 2.32                                     |
| MAE      |           | 1.51                                     |

4) CCSD(T) and DFT results. Refer to Table II of Ref. [4] for the reported CCSD total energy predictions. The DFT/QZP-g results are from Siam Quantum software using the same geometries as in the QMC calculations [2]. The exact energies are from Ref. [1].

**Table S6.** Error of the predicted DFT and CCSD(T) total energies.

| [Ranasinghe 2013] |                          |                           |                          |                          |                         |                                |
|-------------------|--------------------------|---------------------------|--------------------------|--------------------------|-------------------------|--------------------------------|
| Name              | CCSD-Exact<br>[kcal/mol] | B3LYP-Exact<br>[kcal/mol] | BLYP-Exact<br>[kcal/mol] | OLYP-Exact<br>[kcal/mol] | PBE-Exact<br>[kcal/mol] | This Work -Exact<br>[kcal/mol] |
| H2                | 0.0                      | -3.8                      | 2.7                      | -0.3                     | 5.0                     | -2.3                           |
| LiH               | 28.7                     | -11.4                     | -1.6                     | -2.9                     | 14.6                    | -2.7                           |
| BeH               |                          | -13.3                     | -2.0                     | -4.3                     | 18.0                    | -3.5                           |
| Li2               | 57.3                     | -14.9                     | -1.6                     | -7.2                     | 24.7                    | -2.4                           |
| CH                |                          | -13.0                     | -2.4                     | -1.2                     | 29.1                    | 2.0                            |
| CH2 (1A1)         |                          | -12.1                     | 1.8                      | 2.3                      | 32.8                    | 5.2                            |
| CH2 (3B1)         |                          | -15.0                     | 0.7                      | -2.8                     | 25.5                    | -2.5                           |
| NH                |                          | -15.9                     | -5.6                     | -4.7                     | 30.0                    | -0.3                           |
| CH3               |                          | -17.1                     | 2.4                      | -0.9                     | 27.5                    | -0.6                           |
| NH2               |                          | -19.0                     | -6.0                     | -4.8                     | 28.4                    | -1.8                           |
| OH                |                          | -23.1                     | -14.5                    | -7.6                     | 30.7                    | -1.8                           |
| CH4               | 36.7                     | -16.5                     | 6.8                      | 1.4                      | 30.5                    | 2.0                            |
| H2O               | 39.5                     | -20.7                     | -10.0                    | -5.7                     | 33.4                    | 0.8                            |
| HF                | 41.0                     | -23.8                     | -17.6                    | -7.9                     | 37.9                    | 1.6                            |
| NH3               | 38.3                     | -17.4                     | -0.6                     | -1.8                     | 31.4                    | 1.4                            |
| LiF               | 71.0                     | -31.9                     | -24.1                    | -9.4                     | 48.5                    | 2.7                            |
| CN                | 75.3                     | -17.6                     | -13.0                    | -7.5                     | 48.7                    | 3.0                            |
| C2H2              | 72.0                     | -21.5                     | -2.4                     | -1.5                     | 49.1                    | 5.7                            |
| CO                | 75.2                     | -25.2                     | -18.1                    | -7.0                     | 54.2                    | 4.8                            |
| HCN               | 72.5                     | -24.0                     | -11.8                    | -6.6                     | 49.6                    | 3.1                            |
| N2                | 75.3                     | -22.3                     | -15.3                    | -7.6                     | 53.4                    | 4.8                            |
| HCO               |                          | -32.3                     | -22.2                    | -13.5                    | 47.8                    | -2.6                           |
| NO                | 80.4                     | -29.7                     | -25.7                    | -14.7                    | 52.3                    | -0.7                           |
| C2H4              | 72.2                     | -25.3                     | 3.5                      | 0.6                      | 52.1                    | 6.0                            |
| H2CO              |                          | -32.4                     | -16.6                    | -10.3                    | 52.2                    | 1.2                            |
| O2                | 79.0                     | -43.0                     | -41.6                    | -29.0                    | 45.3                    | -11.9                          |
| C2H6              | 72.8                     | -27.6                     | 12.2                     | 3.8                      | 56.0                    | 7.0                            |
| F2                | 83.1                     | -48.0                     | -49.5                    | -23.9                    | 62.3                    | -4.5                           |
| H2O2              |                          | -40.8                     | -30.5                    | -16.0                    | 55.7                    | -2.9                           |
| H3COH             |                          | -34.3                     | -7.7                     | -4.8                     | 57.4                    | 3.7                            |
| N2H4              |                          | -32.4                     | -6.3                     | -5.5                     | 54.8                    | 2.6                            |
| CO2               |                          | -48.3                     | -52.1                    | -24.5                    | 71.7                    | -2.9                           |
| COUNT             | 18                       | 32                        | 32                       | 32                       | 32                      | 32                             |
| MAE               | 59.5                     | 24.2                      | 13.4                     | 7.6                      | 41.0                    | 3.2                            |
| ME                | 59.5                     | -24.2                     | -11.5                    | -7.1                     | 41.0                    | 0.4                            |

## Dipole Moments and Zero Point Energies

**Table S7.** Calculated dipole moments and zero point energies.

| name       | Dipole                                    |                                                 | ZPE                       |                                         |                                          |                                              |
|------------|-------------------------------------------|-------------------------------------------------|---------------------------|-----------------------------------------|------------------------------------------|----------------------------------------------|
|            | (This Work)<br>QZP-gh<br>Calc.<br>[Debye] | (This Work)<br>QZP-gh<br>Calc. - exp<br>[Debye] | exp.<br>ZPE<br>[kcal/mol] | -----<br>6-31G*<br>ZPE<br>[Ha]<br>----- | This Work<br>6-31G*<br>ZPE<br>[kcal/mol] | -----<br>6-31G*<br>Calc. - exp<br>[kcal/mol] |
| H2         | 0.0000                                    |                                                 | 6.2                       | 0.00996                                 | 6.2                                      | 0.0                                          |
| LiH        | 5.7155                                    | -0.1685                                         | 2.0                       | 0.00307                                 | 1.9                                      | -0.1                                         |
| BeH        | 0.2744                                    |                                                 | 2.9                       | 0.00455                                 | 2.9                                      | -0.1                                         |
| Li2        | 0.0000                                    |                                                 | 0.5                       | 0.00073                                 | 0.5                                      | 0.0                                          |
| CH         | 1.4316                                    | -0.0284                                         | 4.0                       | 0.00614                                 | 3.9                                      | -0.2                                         |
| CH2 (1A1)  | 1.7713                                    |                                                 |                           | 0.01600                                 | 10.0                                     |                                              |
| CH2 (3B1)  | 0.5995                                    |                                                 |                           | 0.01705                                 | 10.7                                     |                                              |
| NH         | 1.4964                                    | 0.1064                                          | 4.6                       | 0.00716                                 | 4.5                                      | -0.1                                         |
| CH3        | 0.0000                                    |                                                 |                           | 0.02916                                 | 18.3                                     |                                              |
| NH2        | 1.7602                                    |                                                 | 11.5                      | 0.01844                                 | 11.6                                     | 0.1                                          |
| OH         | 1.6224                                    | -0.0326                                         | 5.3                       | 0.00807                                 | 5.1                                      | -0.2                                         |
| CH4        | 0.0000                                    |                                                 | 27.1                      | 0.04417                                 | 27.7                                     | 0.6                                          |
| H2O        | 1.8436                                    | -0.0110                                         | 12.9                      | 0.02065                                 | 13.0                                     | 0.1                                          |
| HF         | 1.7639                                    | -0.0623                                         | 5.9                       | 0.00884                                 | 5.5                                      | -0.3                                         |
| NH3        | 1.5085                                    | 0.0367                                          | 20.6                      | 0.03373                                 | 21.2                                     | 0.5                                          |
| LiF        | 6.0996                                    | -0.2278                                         | 1.3                       | 0.00218                                 | 1.4                                      | 0.1                                          |
| CN         | 1.1573                                    |                                                 | 2.9                       | 0.00475                                 | 3.0                                      | 0.0                                          |
| C2H2       | 0.0002                                    |                                                 | 15.3                      | 0.02459                                 | 15.4                                     | 0.1                                          |
| CO         | 0.1849                                    | 0.0751                                          | 3.1                       | 0.00481                                 | 3.0                                      | -0.1                                         |
| HCN        | 2.9238                                    | -0.0614                                         | 8.7                       | 0.01422                                 | 8.9                                      | 0.2                                          |
| N2         | 0.0006                                    |                                                 | 3.4                       | 0.00535                                 | 3.4                                      | 0.0                                          |
| HCO        | 1.3894                                    |                                                 | 7.8                       | 0.01259                                 | 7.9                                      | 0.1                                          |
| NO         | 0.2064                                    | 0.0477                                          | 2.7                       | 0.00431                                 | 2.7                                      | 0.0                                          |
| C2H4       | 0.0000                                    |                                                 |                           | 0.04981                                 | 31.3                                     |                                              |
| H2CO       | 2.2030                                    | -0.1290                                         | 16.1                      | 0.02588                                 | 16.2                                     | 0.1                                          |
| O2         | 0.0002                                    |                                                 | 2.3                       | 0.00356                                 | 2.2                                      | 0.0                                          |
| C2H6       | 0.0000                                    |                                                 |                           | 0.07341                                 | 46.1                                     |                                              |
| F2         | 0.0000                                    |                                                 | 1.3                       | 0.00228                                 | 1.4                                      | 0.1                                          |
| H2O2       | 1.7142                                    | 0.1412                                          |                           | 0.02535                                 | 15.9                                     |                                              |
| H3COH      | 1.5683                                    | -0.1317                                         |                           | 0.05006                                 | 31.4                                     |                                              |
| N2H4       | 1.8773                                    | 0.1273                                          |                           | 0.05197                                 | 32.6                                     |                                              |
| CO2        | 0.0002                                    |                                                 | 6.2                       | 0.00979                                 | 6.1                                      | -0.1                                         |
| SiH2 (1A1) | 0.2229                                    |                                                 | 7.2                       | 0.01132                                 | 7.1                                      | -0.1                                         |
| SiH2 (3B1) | 0.0490                                    |                                                 |                           | 0.01180                                 | 7.4                                      |                                              |
| PH2        | 0.6047                                    |                                                 |                           | 0.01310                                 | 8.2                                      |                                              |
| SiH3       | 0.0239                                    |                                                 |                           | 0.02069                                 | 13.0                                     |                                              |
| H2S        | 1.0313                                    | 0.0530                                          | 9.2                       | 0.01479                                 | 9.3                                      | 0.1                                          |
| HCl        | 1.1216                                    | 0.0130                                          | 4.2                       | 0.00657                                 | 4.1                                      | -0.1                                         |
| PH3        | 0.6647                                    | 0.0907                                          | 14.6                      | 0.02354                                 | 14.8                                     | 0.2                                          |
| SiH4       | 0.0000                                    |                                                 | 19.2                      | 0.03035                                 | 19.0                                     | -0.2                                         |
| CS         | 1.9319                                    | -0.0261                                         | 1.8                       | 0.00282                                 | 1.8                                      | -0.1                                         |
| SiO        | 2.8138                                    | -0.2844                                         | 1.8                       | 0.00269                                 | 1.7                                      | -0.1                                         |
| SO         | 1.3671                                    | -0.1829                                         | 1.6                       | 0.00243                                 | 1.5                                      | -0.1                                         |
| ClO        | 1.3514                                    | 0.0544                                          | 1.2                       | 0.00187                                 | 1.2                                      | 0.0                                          |
| CH3Cl      | 1.8790                                    | -0.0173                                         |                           | 0.03717                                 | 23.3                                     |                                              |
| ClF        | 0.7458                                    | -0.1423                                         | 1.1                       | 0.00170                                 | 1.1                                      | -0.1                                         |
| H3CSH      | 1.5600                                    | 0.0400                                          |                           | 0.04523                                 | 28.4                                     |                                              |
| HOCl       | 1.5324                                    | 0.2324                                          | 8.0                       | 0.01263                                 | 7.9                                      | 0.0                                          |
| SO2        | 1.5061                                    | -0.1270                                         | 4.3                       | 0.00639                                 | 4.0                                      | -0.3                                         |
| Na2        | 0.0000                                    |                                                 | 0.2                       | 0.00034                                 | 0.2                                      | 0.0                                          |
| NaCl       | 8.6939                                    | -0.3073                                         | 0.5                       | 0.00078                                 | 0.5                                      | 0.0                                          |
| Si2        | 0.0000                                    |                                                 | 0.7                       | 0.00121                                 | 0.8                                      | 0.0                                          |
| P2         | 0.0007                                    |                                                 | 1.1                       | 0.00175                                 | 1.1                                      | 0.0                                          |
| S2         | 0.0002                                    |                                                 | 1.0                       | 0.00154                                 | 1.0                                      | -0.1                                         |
| Cl2        | 0.0000                                    |                                                 | 0.8                       | 0.00115                                 | 0.7                                      | -0.1                                         |
| Si2H6      | 0.0000                                    |                                                 |                           | 0.04776                                 | 30.0                                     |                                              |
|            | <b>Avg E</b>                              | -0.03                                           |                           |                                         | <b>Avg E</b>                             | -0.003                                       |
|            | <b>MAE</b>                                | 0.11                                            |                           |                                         | <b>MAE</b>                               | 0.120                                        |
|            | <b>Count</b>                              | 28                                              |                           |                                         | <b>Count</b>                             | 42                                           |

For dipole moments, refer to the experimental values from Ref. [5]. For the zero point energies, we calculated the “exp.” values listed above from experimental vibration energies in Ref. [5]. For diatomic molecules where the anharmonic term  $\omega_e x_e$  was available, we used

$$\text{ZPE} = \frac{1}{2} \omega_e - \frac{1}{4} \omega_e x_e. \quad (\text{S15})$$

For polyatomic molecules, we used

$$\text{ZPE} = \sum_{\text{all modes}} \frac{1}{2} \omega_e. \quad (\text{S16})$$

### **Molecular Coordinates**

For H<sub>2</sub> we used experimental bond length of 0.741 angstroms. For other 55 molecules, the geometries could be downloaded from the supplementary material of Ref. [2], (doi: 10.1063/1.3288054)

## Basis Set Convergence Test

We test the basis set convergence using the basis TZP, QZP-g, pcseg3-g[6], and pcseg4-gh[6], on the order of the basis size. Due to our limited computing resources, the test set only includes 15 first-row diatomic molecules.

Using the exchange-correlation functional in this work, the calculated total energies are shown below.

| Name | Siam Quantum<br>TZP<br>[Hartrees] | Siam Quantum<br>QZP-g<br>[Hartrees] | Siam Quantum<br>pcseg3-g<br>[Hartrees] | Siam Quantum<br>pcseg4-gh<br>[Hartrees] |
|------|-----------------------------------|-------------------------------------|----------------------------------------|-----------------------------------------|
| H2   | -1.177388                         | -1.178148                           | -1.178281                              | -1.178298                               |
| LiH  | -8.073748                         | -8.074777                           | -8.074882                              | -8.074975                               |
| BeH  | -15.251245                        | -15.252419                          | -15.252565                             | -15.252752                              |
| Li2  | -14.998035                        | -14.998953                          | -14.99906                              | -14.999204                              |
| CH   | -38.472138                        | -38.47566                           | -38.476653                             | -38.476839                              |
| NH   | -55.219111                        | -55.223226                          | -55.224899                             | -55.225091                              |
| OH   | -75.73433                         | -75.739939                          | -75.742386                             | -75.742667                              |
| HF   | -100.449627                       | -100.456684                         | -100.460007                            | -100.460236                             |
| LiF  | -107.423184                       | -107.43016                          | -107.432215                            | -107.432634                             |
| CN   | -92.714928                        | -92.720175                          | -92.721855                             | -92.722082                              |
| CO   | -113.311999                       | -113.318379                         | -113.320858                            | -113.321175                             |
| N2   | -109.528046                       | -109.534502                         | -109.537125                            | -109.53752                              |
| NO   | -129.899165                       | -129.905881                         | -129.9093058                           | -129.909686                             |
| O2   | -150.338588                       | -150.345597                         | -150.349715                            | -150.350198                             |
| F2   | -199.528356                       | -199.537481                         | -199.542052                            | -199.54265                              |

We also plot the data with reference to the exact total energies from Ref. [1]. The QMC results are also shown for comparison and discussion.

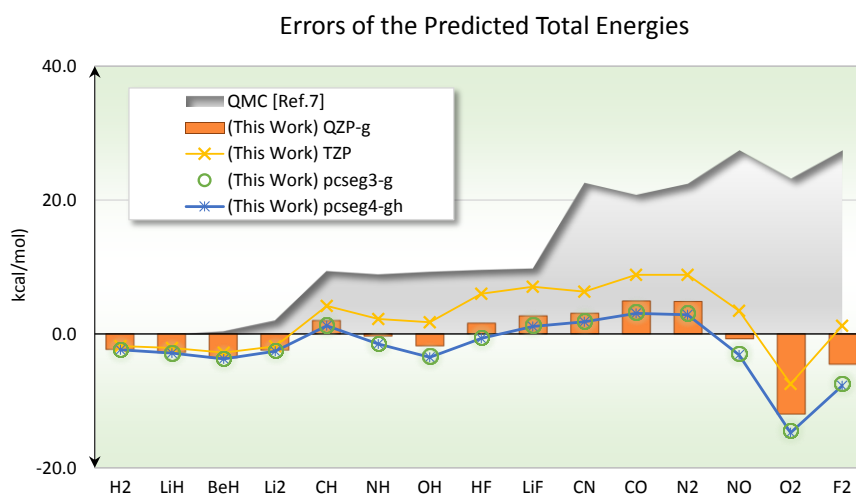

As seen from the graph, going from the TZP to QZP-g, the energies shift downward appreciably. But from QZP-g to pcseg3-g, the shift becomes small. Finally, going from pcseg3-g to pcseg4-gh, the shift is negligible. If we take the pcseg4-gh as the reference energies and see how much other basis sit above it, we get the following table.

| <b>Name</b>  | <b>pcseg3 - pcseg4<br/>[kcal/mol]</b> | <b>QZP - pcseg4<br/>[kcal/mol]</b> |
|--------------|---------------------------------------|------------------------------------|
| H2           | 0.01                                  | 0.09                               |
| LiH          | 0.06                                  | 0.12                               |
| BeH          | 0.12                                  | 0.21                               |
| Li2          | 0.09                                  | 0.16                               |
| CH           | 0.12                                  | 0.74                               |
| NH           | 0.12                                  | 1.17                               |
| OH           | 0.18                                  | 1.71                               |
| HF           | 0.14                                  | 2.23                               |
| LiF          | 0.26                                  | 1.55                               |
| CN           | 0.14                                  | 1.20                               |
| CO           | 0.20                                  | 1.75                               |
| N2           | 0.25                                  | 1.89                               |
| NO           | 0.24                                  | 2.39                               |
| O2           | 0.30                                  | 2.89                               |
| F2           | 0.38                                  | 3.24                               |
| <b>COUNT</b> | 15                                    | 15                                 |
| <b>MAE</b>   | 0.2                                   | 1.4                                |
| <b>ME</b>    | 0.2                                   | 1.4                                |

From the table, pcseg4-gh should be very close to the basis set limit. Assuming the pcseg4gh is the basis set limit, pcseg3-g basis set error is 0.2 kcal/mol on average. QZP-g sits 1.4 kcal/mol above the basis set limit on average.

In this test we use DFT energies from our exchange-correlation functional; but the 0.2 kcal/mol error of the pcseg3-g is very close to the errors associated with HF energies of the basis pc3 reported by F. Jensen [7]. In Table 3 of Ref. [7], the pc3's error is 0.43 mH or 0.27 kcal/mol. Therefore, we believe our convergence test result is reasonable.

Finally, we look at the MAE for each basis as follows.

| <b>Name</b>  | <b>TZP - exact<br/>[kcal/mol]</b> | <b>QZP - exact<br/>[kcal/mol]</b> | <b>pcseg3 - exact<br/>[kcal/mol]</b> | <b>pcseg4 - exact<br/>[kcal/mol]</b> |
|--------------|-----------------------------------|-----------------------------------|--------------------------------------|--------------------------------------|
| H2           | -1.8                              | -2.3                              | -2.4                                 | -2.4                                 |
| LiH          | -2.1                              | -2.7                              | -2.8                                 | -2.9                                 |
| BeH          | -2.8                              | -3.5                              | -3.6                                 | -3.7                                 |
| Li2          | -1.8                              | -2.4                              | -2.5                                 | -2.6                                 |
| CH           | 4.2                               | 2.0                               | 1.3                                  | 1.2                                  |
| NH           | 2.3                               | -0.3                              | -1.4                                 | -1.5                                 |
| OH           | 1.7                               | -1.8                              | -3.3                                 | -3.5                                 |
| HF           | 6.0                               | 1.6                               | -0.5                                 | -0.7                                 |
| LiF          | 7.0                               | 2.7                               | 1.4                                  | 1.1                                  |
| CN           | 6.3                               | 3.0                               | 2.0                                  | 1.8                                  |
| CO           | 8.8                               | 4.8                               | 3.3                                  | 3.1                                  |
| N2           | 8.8                               | 4.8                               | 3.1                                  | 2.9                                  |
| NO           | 3.5                               | -0.7                              | -2.9                                 | -3.1                                 |
| O2           | -7.5                              | -11.9                             | -14.4                                | -14.7                                |
| F2           | 1.2                               | -4.5                              | -7.4                                 | -7.7                                 |
| <b>COUNT</b> | 15                                | 15                                | 15                                   | 15                                   |
| <b>MAE</b>   | 4.4                               | 3.3                               | 3.5                                  | 3.5                                  |
| <b>ME</b>    | 2.3                               | -0.8                              | -2.0                                 | -2.2                                 |

Notice that the MAE for QZP-g, pcseg3-g, pcseg4-gh are very close. There are 3.3, 3.5, and 3.5 respectively. Therefore, we conclude that if we use QZP-g basis set, the reported MAE should not be off by 0.2 kcal/mol from the basis set limit.

## References

1. O'Neill, D.P.; Gill, P.M.W. Benchmark correlation energies for small molecules. *Mol. Phys.* **2005**, *103*, 763–766, doi:10.1080/00268970512331339323.
2. Nemec, N.; Towler, M.D.; Needs, R.J. Benchmark all-electron ab initio quantum Monte Carlo calculations for small molecules. *J. Chem. Phys.* **2010**, *132*, 034111, doi:10.1063/1.3288054.
3. Brown, M.D.; Trail, J.R.; López Ríos, P.; Needs, R.J. Energies of the first row atoms from quantum Monte Carlo. *J. Chem. Phys.* **2007**, *126*, 224110, doi:10.1063/1.2743972.
4. Ranasinghe, D.S.; Petersson, G.A. CCSD(T)/CBS atomic and molecular benchmarks for H through Ar. *J. Chem. Phys.* **2013**, *138*, 144104, doi:10.1063/1.4798707.
5. D.R. Lide, *CRC Handbook of Chemistry and Physics: A Ready-Reference of Chemical and Physical Data* (CRC press, Florida, 2005).
6. Jensen, F. Unifying General and Segmented Contracted Basis Sets. Segmented Polarization Consistent Basis Sets. *J. Chem. Theory Comput.* **2014**, *10*, 1074–1085, doi:10.1021/ct401026a.
7. Jensen, F. Estimating the Hartree—Fock limit from finite basis set calculations. *Theor. Chem. Acc.* **2005**, *113*, 267–273, doi:10.1007/s00214-005-0635-2.
